# Supplementary material for: Predicting Time-to-Healing from a Digital Wound Image: A Hybrid Neural Network and Decision Tree Approach Improves Performance
Source: MDPI journal article supplement (doi:10.3390/computation12030042), 2024-02-28
Supplement: s1 [file s1]

Table S1: Dog wound image augmentation transformations used

| Operation name          | Operation description                                                                                   | Operation values                                                                                      |
|-------------------------|---------------------------------------------------------------------------------------------------------|-------------------------------------------------------------------------------------------------------|
| <b>RotateRange</b>      | perform rotations on images by arbitrary numbers of degrees                                             | max_right_rotation = 25<br>max_left_rotation = -25<br>probability = 1.0                               |
| <b>Skew</b>             | Skew an image in a random direction, either left to right, top to bottom, or one of 8 corner directions | magnitude = 1<br>skew_type = TILT<br>probability = 0.7                                                |
| <b>Skew</b>             | Skew an image in a random direction, either left to right, top to bottom, or one of 8 corner directions | magnitude = 1<br>skew_type = CORNER<br>probability = 0.7                                              |
| <b>Shear</b>            | Shear images, that is to tilt them in a certain direction.                                              | max_shear_left = 15<br>max_shear_right = 15<br>probability = 0.5                                      |
| <b>Flip</b>             | mirror images through the x or y axes                                                                   | top_bottom_left_right = LEFT_RIGHT<br>probability = 0.5                                               |
| <b>Flip</b>             | mirror images through the x or y axes                                                                   | top_bottom_left_right = TOP_BOTTOM<br>probability = 0.5                                               |
| <b>Distort</b>          | performs randomised, elastic distortions on images                                                      | randomise_magnitude = True<br>probability = 0.3<br>magnitude = 1<br>grid_width = 6<br>grid_height = 6 |
| <b>RandomBrightness</b> | random change image brightness                                                                          | max_factor = 1.3<br>min_factor = 0.7<br>probability = 0.4                                             |
| <b>RandomContrast</b>   | random change contrast of an image                                                                      | max_factor = 1.1<br>min_factor = 0.9<br>probability = 0.4                                             |
