# Supplementary material for: Predicting Time-to-Healing from a Digital Wound Image: A Hybrid Neural Network and Decision Tree Approach Improves Performance
Source: MDPI journal article supplement (doi:10.3390/computation12030042), 2024-02-28
Supplement: s1 [file s1]

Archive with 1 entries (1 files):
- computation-2863215-supplementary.pdf
